# Supplementary material for: Enhanced photodegradation of diphenhydramine in aqueous solution containing natural sand particles
Source: Royal Society of Chemistry journal article supplement (doi:10.1039/d0ra02019b), 2020-01-01
Supplement: d0ra02019b1.pdf [file d0ra02019b1.pdf]

## Supporting information

for

### Enhanced photodegradation of diphenhydramine in aqueous solution containing natural sands

Chunlin Yi,<sup>a</sup> Lihong Song,<sup>a</sup> Qingfeng Wu,<sup>\*a</sup> Zhaohui Li,<sup>\*b</sup> Weibin Zhang<sup>a</sup> and Ke Yin<sup>c</sup>

<sup>a</sup>School of Physics and Optoelectronic Engineering, Yangtze University, 1 Nanhuan Road,  
Jingzhou, Hubei 434023, China

<sup>b</sup>Department of Geosciences, University of Wisconsin-Parkside, 900 Wood Road, Kenosha, WI  
53144, USA

<sup>c</sup>Faculty of Earth Sciences, China University of Geosciences, 388 Lumo Road, Wuhan, Hubei  
430074, China

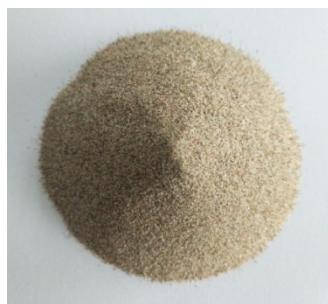

DS sand

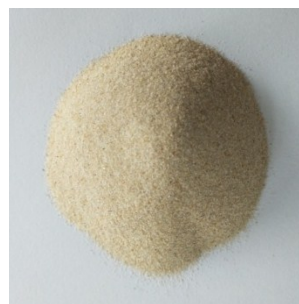

SS sand

Fig. S1. The sand samples DS and SS

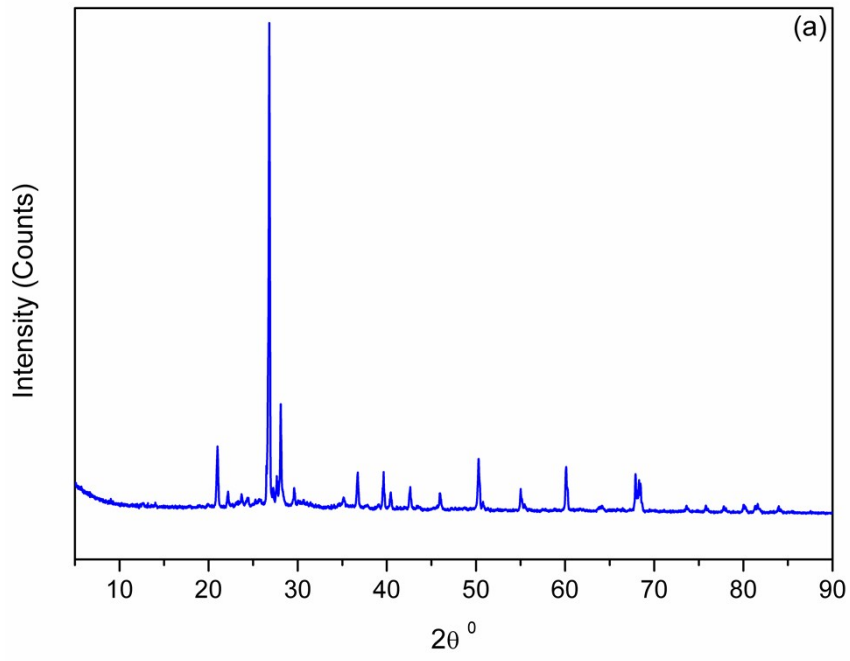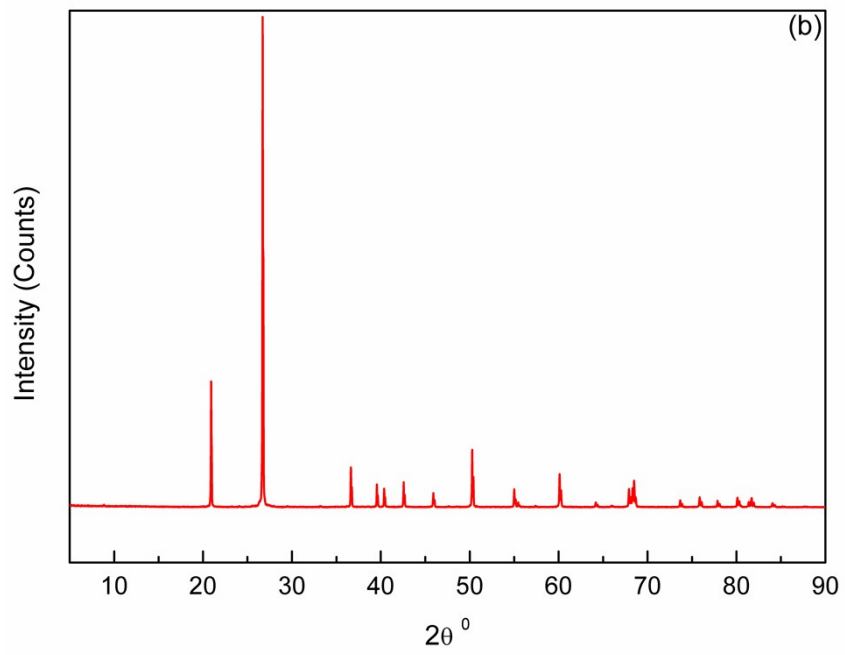

Fig. S2. The XRD patterns of the natural sand DS (a) and SS (b).

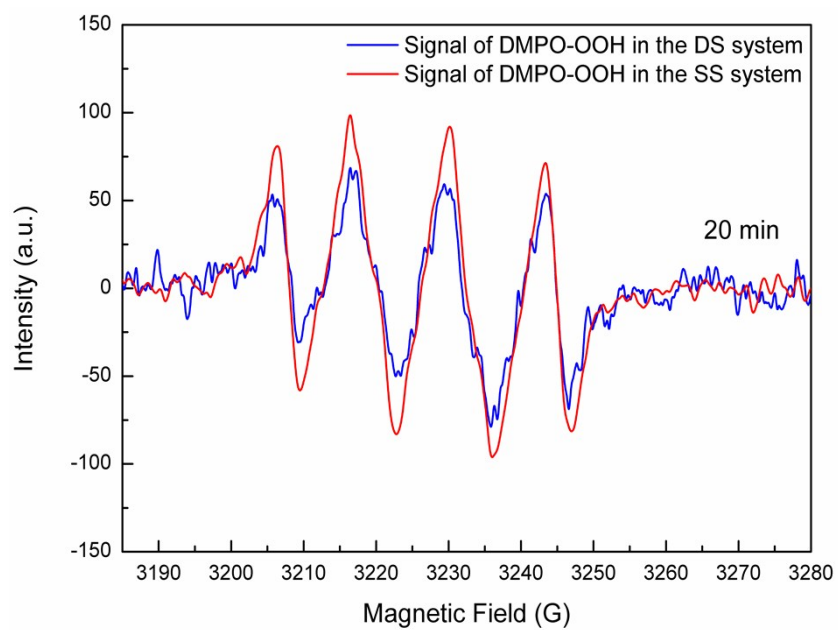

Fig. S3. The comparison of the signal of DMPO-  $O_2^{\cdot-}$  adducts in the DS and SS systems

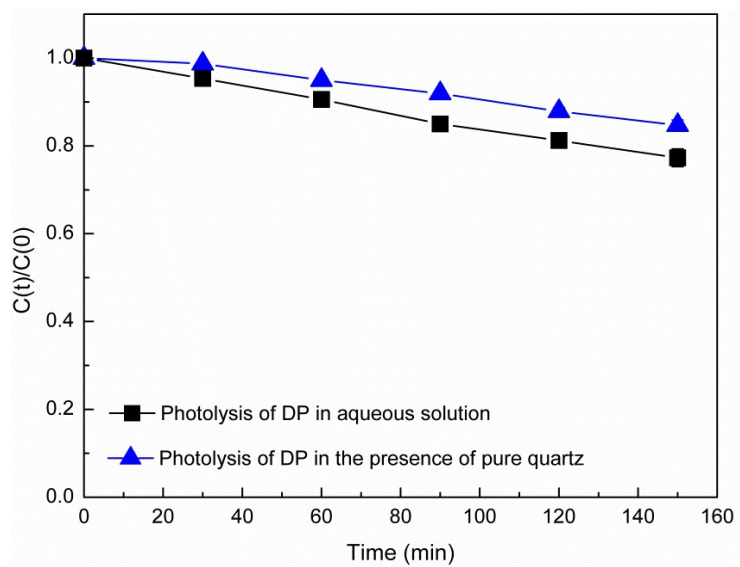

Fig. S4. The photolysis of DP in aqueous solution and in the presence of pure  $\text{SiO}_2$
